# Supplementary material for: Reactivity of 4-amino-3,5-bis(pyridin-2-yl)-1,2,4-triazole, structures and magnetic properties of polynuclear and polymeric Mn(ii), Cu(ii) and Cd(ii) complexes
Source: Royal Society of Chemistry journal article supplement (doi:10.1039/b914702k), 2009-01-01
Supplement: b914702k.pdf [file b914702k.pdf]

## Supplementary information

for

# Reactivity of 4-Amino-3,5-bis(pyridin-2-yl)-1,2,4-triazole, Structures and Magnetic Properties of Polynuclear and Polymeric Mn(II), Cu(II) and Cd(II) Complexes

Zhao-Sha Meng,<sup>a</sup> Lei Yun,<sup>a</sup> Wei-Xiong Zhang,<sup>a</sup> Chao-Gang Hong,<sup>a</sup> Radovan Herchel,<sup>b</sup> Yong-Cong  
Ou,<sup>a</sup> Ji-Dong Leng,<sup>a</sup> Meng-Xia Peng,<sup>a</sup> Zhuo-Jia Lin,<sup>a</sup> Ming-Liang Tong\*<sup>a</sup>

<sup>a</sup> *Key Laboratory of Bioinorganic and Synthetic Chemistry of Ministry of Education, State Key  
Laboratory of Optoelectronic Materials and Technologies, School of Chemistry and Chemical  
Engineering, Sun Yat-Sen University, Guangzhou 510275, P. R. China. E-mail:  
[tongml@mail.sysu.edu.cn](mailto:tongml@mail.sysu.edu.cn)*

<sup>b</sup> *Department of Inorganic Chemistry, Faculty of Science, Palacky University, Krizkovskeho 10, 771  
47 Olomouc, Czech Republic*

E-mail: [tongml@mail.sysu.edu.cn](mailto:tongml@mail.sysu.edu.cn) (M.-L. Tong)

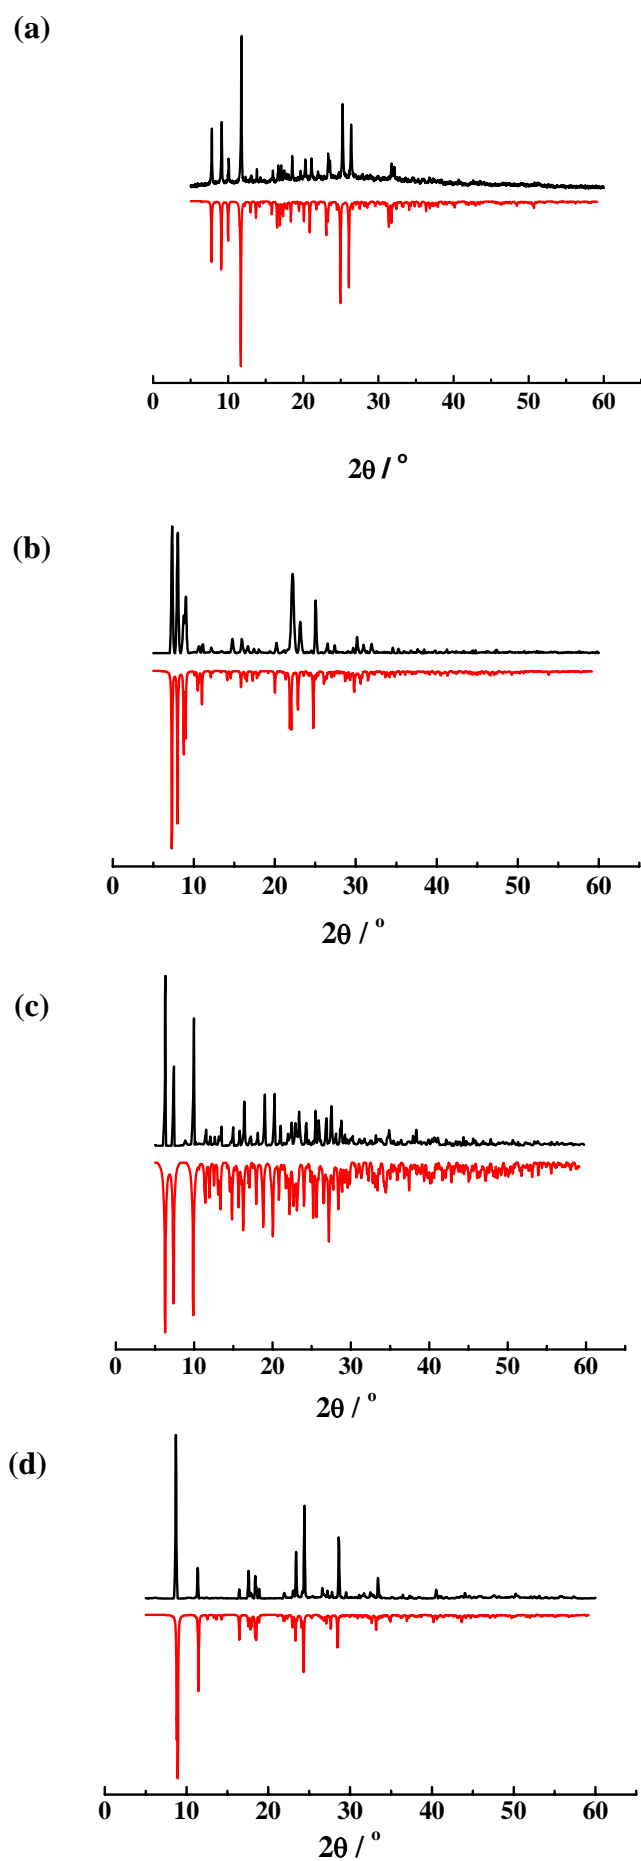

**Figure S1.** Simulated (red) & experimental (black) XRPD data for **2** (a), **3** (b), **4** (c) and **5** (d).

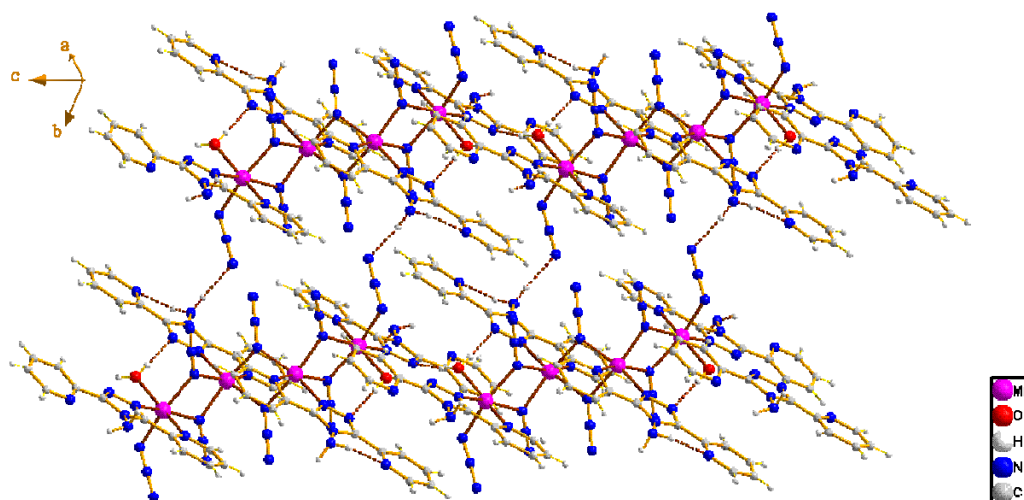

**Figure S2.** The 2D hydrogen-bonded layer in **2**.

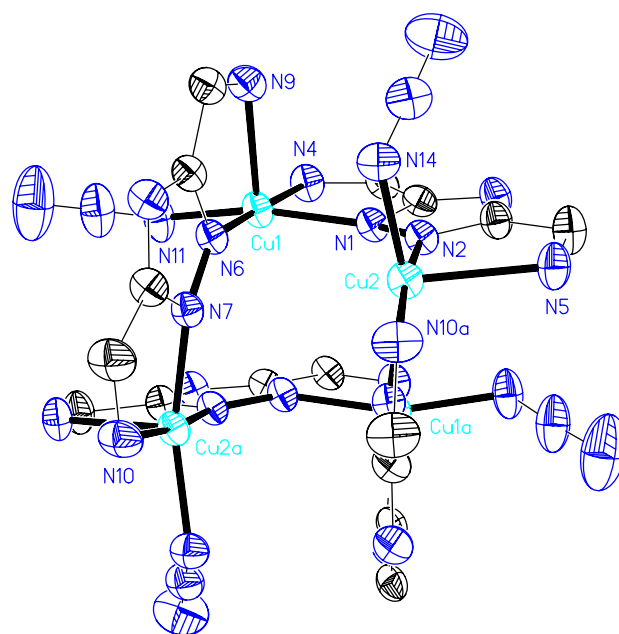

**Figure S3.** ORTEP drawing of the coordination environments of the  $\text{Cu}^{2+}$  ions in **3** with thermal ellipsoids at 50% probability.

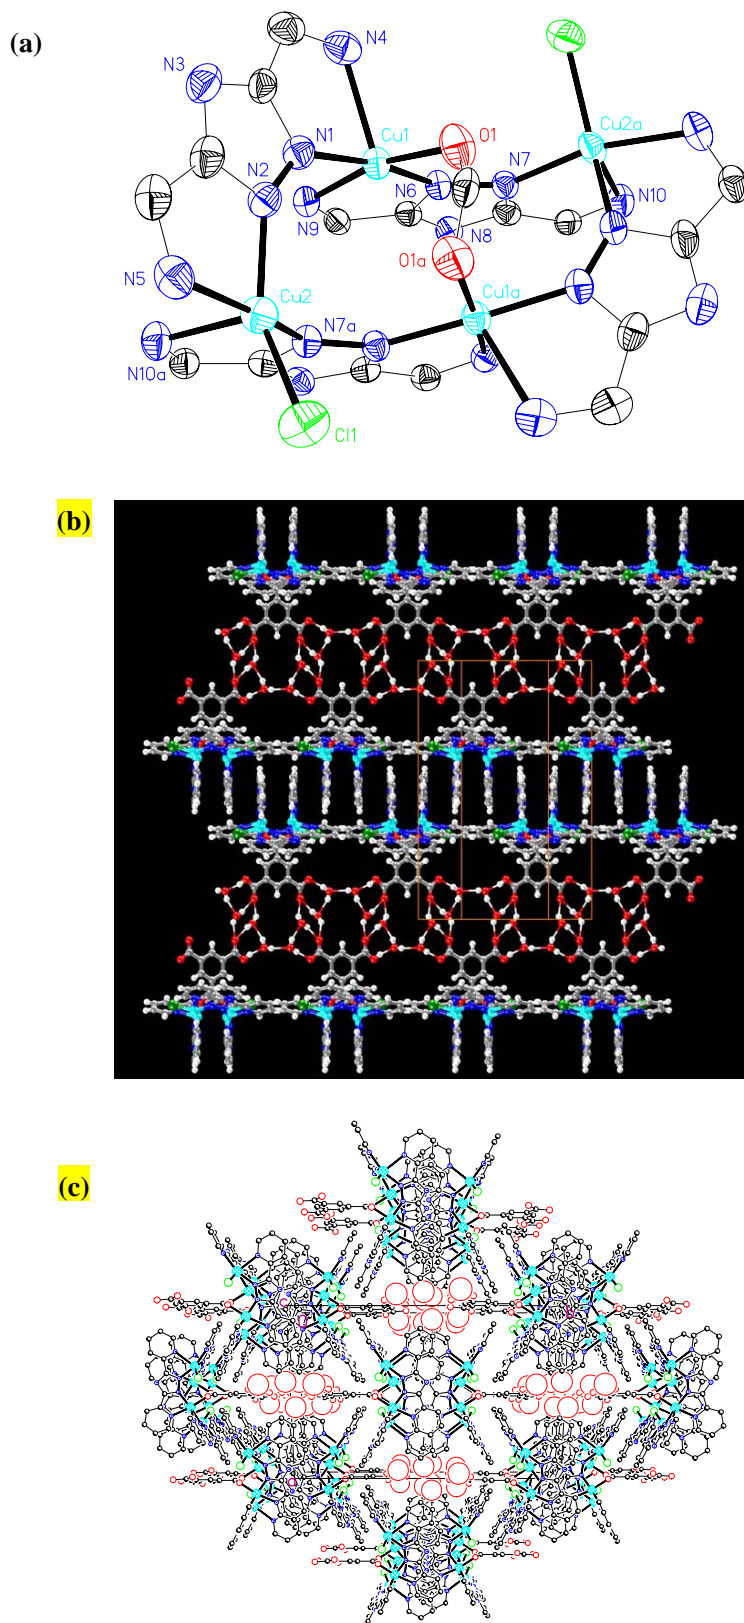

**Figure S4.** The crystal structure of **4**: ORTEP drawings of the coordination environments of the  $\text{Cu}^{2+}$  ions (a), the 2D supramolecular layer (b) and the 3D supramolecular architecture (c) viewed along the *c*-axis.

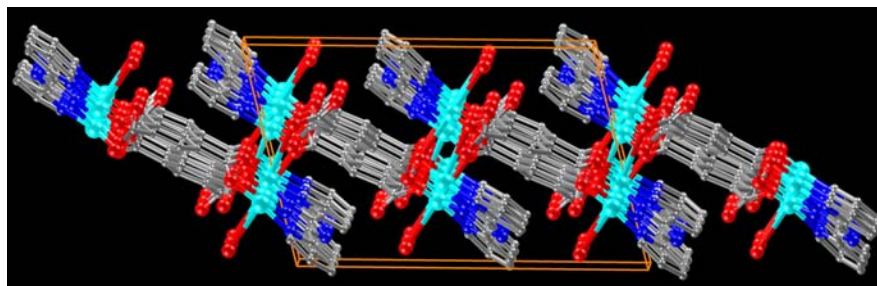

**Figure S5.** The 2D coordination layer in **5**.

**Table S1.** Bond lengths (Å) and angles (°) for **1-5**.

| <b>1</b>                    |            |                                      |            |
|-----------------------------|------------|--------------------------------------|------------|
| Cd(1)-N(10)                 | 2.2953(19) | Cd(1)-N(7 <i>a</i> )                 | 2.3446(19) |
| Cd(1)-N(7)                  | 2.3010(19) | Cd(1)-N(10 <i>b</i> )                | 2.3800(19) |
| Cd(1)-N(1)                  | 2.328(2)   | Cd(1)-N(5)                           | 2.4167(19) |
| N(4)···N(6)                 | 2.844(3)   | N(4)···N(9 <i>c</i> )                | 3.029(3)   |
|                             |            |                                      |            |
| N(10)-Cd(1)-N(7)            | 111.75(7)  | N(1)-Cd(1)-N(10 <i>b</i> )           | 100.19(7)  |
| N(10)-Cd(1)-N(1)            | 95.80(7)   | N(7 <i>a</i> )-Cd(1)-N(10 <i>b</i> ) | 168.74(7)  |
| N(7)-Cd(1)-N(1)             | 150.71(7)  | N(10)-Cd(1)-N(5)                     | 151.46(7)  |
| N(10)-Cd(1)-N(7 <i>a</i> )  | 101.14(7)  | N(7)-Cd(1)-N(5)                      | 88.77(7)   |
| N(7)-Cd(1)-N(7 <i>a</i> )   | 75.48(8)   | N(1)-Cd(1)-N(5)                      | 69.61(6)   |
| N(1)-Cd(1)-N(7 <i>a</i> )   | 90.05(6)   | N(7 <i>a</i> )-Cd(1)-N(5)            | 103.19(7)  |
| N(10)-Cd(1)-N(10 <i>b</i> ) | 73.36(8)   | N(10 <i>b</i> )-Cd(1)-N(5)           | 84.93(6)   |
| N(7)-Cd(1)-N(10 <i>b</i> )  | 97.17(7)   | N(4)-H(4B)···N(9 <i>c</i> )          | 117.6      |
| N(4)-H(4B)···N(6)           | 136.3      |                                      |            |
| <b>2</b>                    |            |                                      |            |
| Mn(1)-N(7)                  | 2.136(5)   | Mn(2)-N(4)                           | 2.192(4)   |
| Mn(1)-O(1w)                 | 2.163(3)   | Mn(2)-N(10)                          | 2.210(4)   |
| Mn(1)-N(1)                  | 2.205(4)   | Mn(2)-N(1)                           | 2.219(4)   |
| Mn(1)-N(13)                 | 2.246(4)   | Mn(2)-N(10 <i>a</i> )                | 2.222(4)   |
| Mn(1)-N(4)                  | 2.312(4)   | Mn(2)-N(19)                          | 2.258(4)   |
| Mn(1)-N(17)                 | 2.327(4)   | Mn(2)-N(23)                          | 2.346(4)   |
| O(1w)···N(20)               | 2.871(5)   | O(1w)···N(14 <i>b</i> )              | 2.853(5)   |
| N(16)···N(18)               | 2.854(6)   | N(16)···N(6 <i>c</i> )               | 3.032(7)   |
| N(22)···N(24)               | 2.839(6)   | N(22)···N(9 <i>d</i> )               | 2.967(7)   |
|                             |            |                                      |            |
| N(7)-Mn(1)-O(1w)            | 95.59(16)  | N(4)-Mn(2)-N(10)                     | 161.99(16) |
| N(7)-Mn(1)-N(1)             | 163.44(17) | N(4)-Mn(2)-N(1)                      | 78.43(14)  |
| O(1w)-Mn(1)-N(1)            | 85.70(14)  | N(10)-Mn(2)-N(1)                     | 92.27(15)  |
| N(7)-Mn(1)-N(13)            | 95.63(17)  | N(4)-Mn(2)-N(10 <i>a</i> )           | 90.80(15)  |
| O(1w)-Mn(1)-N(13)           | 87.62(13)  | N(10)-Mn(2)-N(10 <i>a</i> )          | 77.98(15)  |
| N(1)-Mn(1)-N(13)            | 100.93(14) | N(1)-Mn(2)-N(10 <i>a</i> )           | 110.72(15) |
| N(7)-Mn(1)-N(4)             | 87.61(17)  | N(4)-Mn(2)-N(19)                     | 96.90(15)  |
| O(1w)-Mn(1)-N(4)            | 105.93(14) | N(10)-Mn(2)-N(19)                    | 98.00(14)  |
| N(1)-Mn(1)-N(4)             | 76.20(14)  | N(1)-Mn(2)-N(19)                     | 87.03(13)  |
| N(13)-Mn(1)-N(4)            | 165.74(14) | N(10 <i>a</i> )-Mn(2)-N(19)          | 161.80(14) |
| N(7)-Mn(1)-N(17)            | 96.35(17)  | N(4)-Mn(2)-N(23)                     | 103.32(15) |
| O(1w)-Mn(1)-N(17)           | 156.42(14) | N(10)-Mn(2)-N(23)                    | 91.21(15)  |
| N(1)-Mn(1)-N(17)            | 88.59(14)  | N(1)-Mn(2)-N(23)                     | 157.44(14) |

|                      |            |                       |            |
|----------------------|------------|-----------------------|------------|
| N(13)-Mn(1)-N(17)    | 71.03(13)  | N(10a)-Mn(2)-N(23)    | 91.81(14)  |
| N(4)-Mn(1)-N(17)     | 94.83(14)  | N(19)-Mn(2)-N(23)     | 70.41(13)  |
| O(1w)-H(1wa)···N(20) | 177.4      | O(1w)-H(1wa)···N(14b) | 159.1      |
| N(16)-H(16A)···N(18) | 119.7      | N(16)-H(16B)···N(6c)  | 155.7      |
| N(22)-H(22A)···N(24) | 133.2      | N(22)-H(22B)···N(9d)  | 171.4      |
| <b>3</b>             |            |                       |            |
| Cu(1)-N(11)          | 1.932(5)   | Cu(2)-N(14)           | 1.968(5)   |
| Cu(1)-N(1)           | 1.990(4)   | Cu(2)-N(7a)           | 1.984(4)   |
| Cu(1)-N(6)           | 1.991(4)   | Cu(2)-N(2)            | 1.995(4)   |
| Cu(1)-N(4)           | 2.043(4)   | Cu(2)-N(10a)          | 2.046(4)   |
| Cu(1)-N(9)           | 2.303(5)   | Cu(2)-N(5)            | 2.308(5)   |
| O(1w)···N(3)         | 2.942(7)   | O(1w)···N(14c)        | 3.029(7)   |
| O(2w)···N(8)         | 3.114(9)   | O(2w)···O(1wd)        | 2.807(10)  |
| N(11)-Cu(1)-N(1)     | 162.0(2)   | N(14)-Cu(2)-N(7a)     | 158.85(19) |
| N(11)-Cu(1)-N(6)     | 94.05(18)  | N(14)-Cu(2)-N(2)      | 95.19(18)  |
| N(1)-Cu(1)-N(6)      | 96.70(16)  | N(7a)-Cu(2)-N(2)      | 95.44(16)  |
| N(11)-Cu(1)-N(4)     | 89.8(2)    | N(14)-Cu(2)-N(10a)    | 91.08(19)  |
| N(1)-Cu(1)-N(4)      | 79.64(17)  | N(7a)-Cu(2)-N(10a)    | 79.58(17)  |
| N(6)-Cu(1)-N(4)      | 176.14(18) | N(2)-Cu(2)-N(10a)     | 173.04(18) |
| N(11)-Cu(1)-N(9)     | 102.0(2)   | N(14)-Cu(2)-N(5)      | 98.97(19)  |
| N(1)-Cu(1)-N(9)      | 94.61(17)  | N(7a)-Cu(2)-N(5)      | 101.32(17) |
| N(6)-Cu(1)-N(9)      | 76.15(17)  | N(2)-Cu(2)-N(5)       | 76.00(16)  |
| N(4)-Cu(1)-N(9)      | 102.80(18) | N(10a)-Cu(2)-N(5)     | 100.07(19) |
| O(1w)-H(1wa)···N(3)  | 172.9      | O(1w)-H(1wb)···N(14c) | 177.6      |
| O(2w)-H(2wa)···N(8)  | 138.5      | O(2w)-H(2wb)···O(1wd) | 165.9      |
| <b>4</b>             |            |                       |            |
| Cu(1)-N(6)           | 1.950(4)   | Cu(2)-N(7a)           | 1.989(4)   |
| Cu(1)-N(1)           | 1.970(4)   | Cu(2)-N(2)            | 2.003(4)   |
| Cu(1)-O(1)           | 1.980(4)   | Cu(2)-N(5)            | 2.039(4)   |
| Cu(1)-N(9)           | 2.073(4)   | Cu(2)-Cl(1)           | 2.2520(18) |
| Cu(1)-N(4)           | 2.273(5)   | Cu(2)-N(10a)          | 2.343(4)   |
| O(2)···O(1w)         | 2.643(8)   | O(1w)···O(2w)         | 2.754(8)   |
| O(1w)···O(2)         | 2.643(8)   | O(1w)···O(1wb)        | 2.903(13)  |
| O(2w)···O(3c)        | 2.865(9)   | O(2w)···O(3)          | 2.946(10)  |
| N(6)-Cu(1)-N(1)      | 171.17(17) | N(7a)-Cu(2)-N(2)      | 96.32(17)  |
| N(6)-Cu(1)-O(1)      | 94.73(16)  | N(7a)-Cu(2)-N(5)      | 162.43(18) |
| N(1)-Cu(1)-O(1)      | 91.44(17)  | N(2)-Cu(2)-N(5)       | 79.70(18)  |
| N(6)-Cu(1)-N(9)      | 80.43(16)  | N(7a)-Cu(2)-Cl(1)     | 96.89(13)  |
| N(1)-Cu(1)-N(9)      | 92.22(17)  | N(2)-Cu(2)-Cl(1)      | 146.86(14) |

|                      |            |                                      |            |
|----------------------|------------|--------------------------------------|------------|
| O(1)-Cu(1)-N(9)      | 167.26(17) | N(5)-Cu(2)-Cl(1)                     | 95.54(15)  |
| N(6)-Cu(1)-N(4)      | 108.06(17) | N(7 <i>a</i> )-Cu(2)-N(10 <i>a</i> ) | 76.07(16)  |
| N(1)-Cu(1)-N(4)      | 77.34(18)  | N(2)-Cu(2)-N(10 <i>a</i> )           | 98.47(17)  |
| O(1)-Cu(1)-N(4)      | 97.19(17)  | N(5)-Cu(2)-N(10 <i>a</i> )           | 87.52(17)  |
| N(9)-Cu(1)-N(4)      | 95.52(17)  | Cl(1)-Cu(2)-N(10 <i>a</i> )          | 114.18(13) |
| O(2)-H(2O)···O(1w)   | 166.4      | O(1w)-H(1wa)···O(2w)                 | 158.5      |
| O(1w)-H(1wb)···O(2)  | 173.7      | O(1w)-H(1wc)···O(1wb)                | 166.4      |
| O(2w)-H(2wa)···O(3c) | 150.4      | O(2w)-H(2wb)···O(3)                  | 168.7      |

5

|                        |           |                         |            |
|------------------------|-----------|-------------------------|------------|
| Cu(1)-O(3 <i>a</i> )   | 1.936(5)  | Cu(2)-O(5 <i>c</i> )    | 1.957(5)   |
| Cu(1)-O(1)             | 1.942(5)  | Cu(2)-O(2)              | 1.957(5)   |
| Cu(1)-N(2)             | 1.955(5)  | Cu(2)-N(5)              | 2.046(6)   |
| Cu(1)-N(1)             | 2.034(6)  | Cu(2)-O(3 <i>d</i> )    | 2.785(6)   |
| Cu(1)-O(2 <i>b</i> )   | 2.550(5)  | Cu(1)···Cu(2)           | 4.2924(14) |
| Cu(1)-O(1w)            | 2.581(7)  | Cu(1)···Cu(2 <i>b</i> ) | 3.5122(13) |
| Cu(2)-N(3)             | 1.946(6)  | O(1w)···O(4 <i>a</i> )  | 2.632(8)   |
| O(1w)···N(4 <i>e</i> ) | 2.887(8)  | C(10)···O(1w <i>d</i> ) | 3.379(10)  |
| C(4)···O(1w <i>e</i> ) | 3.198(10) |                         |            |

|                                     |          |                                     |            |
|-------------------------------------|----------|-------------------------------------|------------|
| O(3 <i>a</i> )-Cu(1)-O(1)           | 89.3(2)  | N(1)-Cu(1)-O(1w)                    | 86.8(2)    |
| O(3 <i>a</i> )-Cu(1)-N(2)           | 168.9(2) | O(2 <i>b</i> )-Cu(1)-O(1w)          | 178.31(18) |
| O(1)-Cu(1)-N(2)                     | 98.2(2)  | N(3)-Cu(2)-O(5 <i>c</i> )           | 167.3(2)   |
| O(3 <i>a</i> )-Cu(1)-N(1)           | 92.4(2)  | N(3)-Cu(2)-O(2)                     | 96.8(2)    |
| O(1)-Cu(1)-N(1)                     | 174.7(2) | O(5 <i>c</i> )-Cu(2)-O(2)           | 92.1(2)    |
| N(2)-Cu(1)-N(1)                     | 80.8(2)  | N(3)-Cu(2)-N(5)                     | 79.8(2)    |
| O(3 <i>a</i> )-Cu(1)-O(2 <i>b</i> ) | 82.7(2)  | O(5 <i>c</i> )-Cu(2)-N(5)           | 92.7(2)    |
| O(1)-Cu(1)-O(2 <i>b</i> )           | 93.5(2)  | O(2)-Cu(2)-N(5)                     | 170.4(2)   |
| N(2)-Cu(1)-O(2 <i>b</i> )           | 88.6(2)  | N(3)-Cu(2)-O(3 <i>d</i> )           | 106.2(2)   |
| N(1)-Cu(1)-O(2 <i>b</i> )           | 91.7(2)  | O(5 <i>c</i> )-Cu(2)-O(3 <i>d</i> ) | 84.57(19)  |
| O(3 <i>a</i> )-Cu(1)-O(1w)          | 96.5(2)  | O(2)-Cu(2)-O(3 <i>d</i> )           | 76.25(18)  |
| O(1)-Cu(1)-O(1w)                    | 88.0(2)  | N(5)-Cu(2)-O(3 <i>d</i> )           | 95.94(19)  |
| N(2)-Cu(1)-O(1w)                    | 92.0(2)  | O(6 <i>c</i> )-Cu(2)-O(3 <i>d</i> ) | 138.67(16) |
| O(1w)-H(1wb)···O(4 <i>a</i> )       | 137.6    | O(1w)-H(1wa)···N(4 <i>e</i> )       | 151.5      |
| C(10)-H(10)···O(1w <i>d</i> )       | 169.9    | C(4)-H(4)···O(1w <i>e</i> )         | 153.2      |

Symmetry codes: *a*) -x+1, y, -z+1/2; *b*) -x+1, -y-2, -z+1; *c*) x, y+1, z for **1**; *a*) -x+2, -y+2, -z; *b*) -x+2, -y+1, -z+1; *c*) x+1, y, z; *d*) x, y-1, z for **2**; *a*) -x+2, y, -z+3/2; *c*) -x+5/2, y-1/2, -z+3/2; *d*) -x+5/2, y+1/2, -z+3/2 for **3**; *a*) -x, y, -z-1/2; *b*) -x, y, -z-3/2; *c*) -x, -y+1, -z-1 for **4**; *a*) -x+1, y-1/2, -z-1/2; *b*) -x+1, -y+1, -z; *c*) -x+1, y+1/2, -z-1/2; *d*) x, -y+3/2, z+1/2; *e*) -x, -y+1, -z for **5**.
